# Supplementary material
Source: Springer Nature journal article supplement (https://www.springermedizin.de/resource/supplementary/12887_2006_158_MOESM2_ESM.pdf/9477392)

**Baseline - 15% Wz**

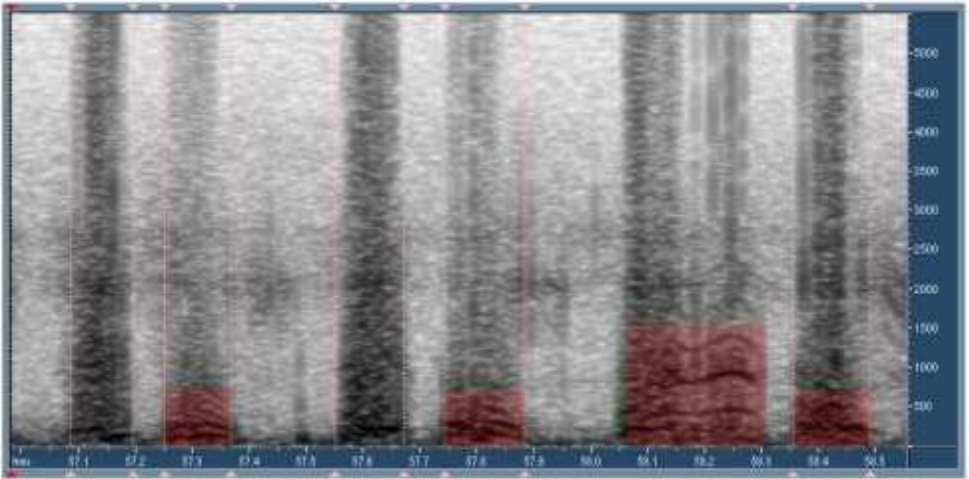

Frequency (Hz)

**After 10 min - 18.8% Wz**

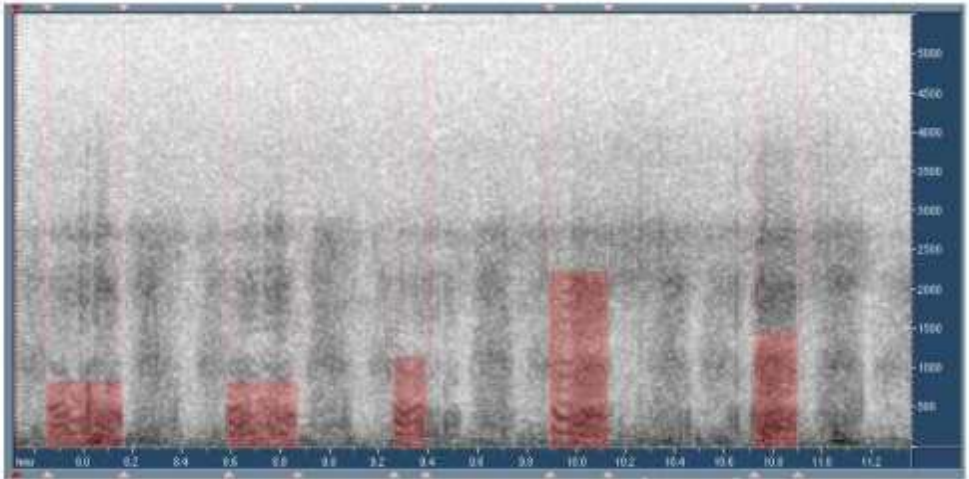

Frequency (Hz)

**After 30 min - 0% Wz**

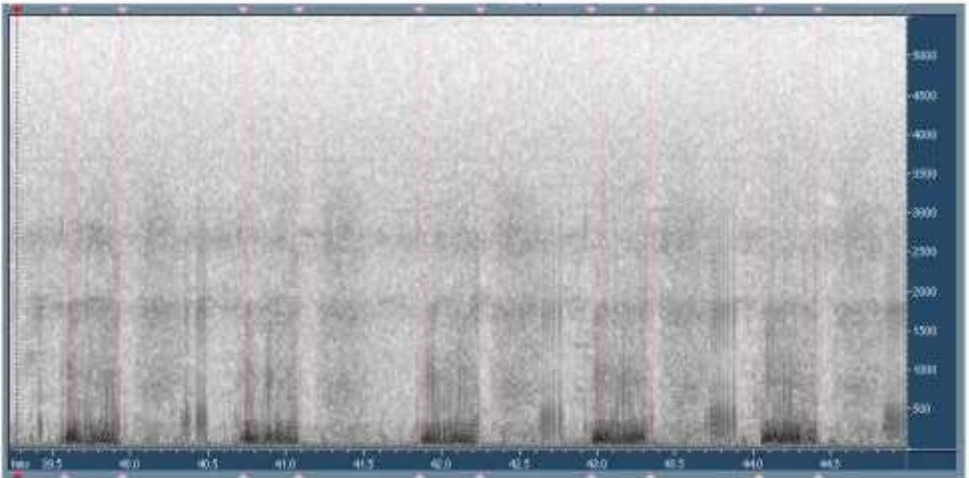

Frequency (Hz)

Time (sec)

Supplement: MOESM2 [file 9477392]
